# Supplementary material for: Palladium nanoparticles on noncovalently functionalized graphene-based heterogeneous catalyst for the Suzuki–Miyaura and Heck–Mizoroki reactions in water
Source: Royal Society of Chemistry journal article supplement (doi:10.1039/c4ra06868h), 2014-01-01
Supplement: c4ra06868h1.pdf [file c4ra06868h1.pdf]

## Supporting information

# Palladium Nanoparticles on Noncovalently Functionalized Graphene-based Heterogeneous Catalyst for the Suzuki–Miyaura and Heck–Mizoroki Reactions in Water

Vittal Sharavath and Sutapa Ghosh\*,

### **<sup>1</sup>H and <sup>13</sup>C NMR Spectroscopic data for the Suzuki–Miyaura reaction products:**

#### **Compound-1 (Biphenyl)<sup>2</sup>**

Colorless solid; <sup>1</sup>H NMR (300 MHz, CDCl<sub>3</sub>): δ=7.29 (2 H, t, Ar-H), 7.39 (4 H, m, Ar-H), 7.53 (4 H, m, Ar-H) ppm.

<sup>13</sup>C NMR (75 MHz, CDCl<sub>3</sub>): δ=127.10, 127.18, 128.67 and 141.15, ppm.

#### **Compound-2 (1,1'-Biphenyl)-4-carboxaldehyde)<sup>2</sup>**

Colorless solid; <sup>1</sup>H NMR (300 MHz, CDCl<sub>3</sub>): δ=7.35-7.47 (3 H, m, Ar-H), 7.60 (2 H; d, Ar-H), 7.73 (2 H, d, Ar-H), 7.94 (2 H, d, Ar-H), 10.03 (1 H, s, -CHO) ppm.

<sup>13</sup>C NMR (75 MHz, CDCl<sub>3</sub>): δ=127.32, 127.64, 128.43, 128.97, 130.24, 135.13, 139.66, 147.16 and 192.1 ppm.

#### **Compound-3 (2-(4-Methoxyphenyl) naphthalene)<sup>3</sup>**

<sup>1</sup>H NMR (300 MHz, CDCl<sub>3</sub>): δ=3.85 (3 H; s, OCH<sub>3</sub>), 6.93-6.98 (2 H, m; Ar-H), 7.37-7.47 (2 H, m, Ar-H), 7.57-7.62 (2 H, m, Ar-H), 7.64-7.68 (1 H, m, Ar-H), 7.78-7.85 (3 H, m, Ar-H), 7.92 (1 H, s, Ar-H) ppm.

$^{13}\text{C}$  NMR (75 MHz,  $\text{CDCl}_3$ ):  $\delta$ =55.29, 114.16, 126.69, 128.11, 128.68, 133.72, 140.91 and 159.1 ppm.

**Compound-4 (4-hydroxy-1, 1'-biphenyl)<sup>2</sup>**

Colorless solid;  $^1\text{H}$  NMR (300 MHz,  $\text{CDCl}_3$ ):  $\delta$ =6.83-6.85 (2 H, m, Ar-H), 7.25 (1 H, t, Ar-H), 7.36 (2 H, t, Ar-H), 7.41 (2 H, d, Ar-H), 7.47 (2 H, d, Ar-H) ppm.

$^{13}\text{C}$  NMR (75 MHz,  $\text{CDCl}_3$ +DMSO):  $\delta$ =115.30, 125.76, 125.82, 127.40, 128.09, 131.51, 140.38 and 156.39.ppm.

**Compound-5 (4-methyl-1, 1'-biphenyl)<sup>1,3,7</sup>**

Colorless solid;  $^1\text{H}$  NMR (300 MHz,  $\text{CDCl}_3$ ):  $\delta$ =2.38 (3 H, s,  $\text{CH}_3$ ), 7.17 (2 H, d, Ar-H), 7.26 (1 H; t Ar-H), 7.36 (2 H, t, Ar-H), 7.41 (2 H, d, Ar-H), 7.50 (2 H, d, Ar-H) ppm.

$^{13}\text{C}$  NMR (75 MHz,  $\text{CDCl}_3$ ):  $\delta$ =21.0, 126.7, 126.9, 128.6, 129.4, 136.6, 136.9, 138.3 and 141.1.ppm.

**Compound-6 (2, 4-Dimethoxy-biphenyl)<sup>1,4</sup>**

Colorless oil;  $^1\text{H}$  NMR (300 MHz,  $\text{CDCl}_3$ ):  $\delta$ =3.74 (3 H, s,  $-\text{OCH}_3$ ), 3.83 (3 H, s,  $-\text{OCH}_3$ ), 6.95-6.82 (3 H, m, Ar-H), 7.34 (1 H, t, Ar-H), 7.40 (2 H, t, Ar-H), 7.53 (2 H, d, Ar-H) ppm.

$^{13}\text{C}$  NMR (75 MHz,  $\text{CDCl}_3$ ):  $\delta$ =55.8, 56.2, 112.5, 112.8, 113.0, 116.0, 116.6, 127.0, 128.0, 129.4, 138.3 and 153.6.ppm.

**Compound-7 (4-[1] Naphthylbenzotrile)**

White solid;  $^1\text{H}$  NMR (500 MHz,  $\text{CDCl}_3$ ):  $\delta$ =7.37 (1 H, dd, Ar-H), 7.44 (1 H, t, Ar-H), 7.53-7.50 (2 H m, Ar-H), 7.58 (2 H, d, Ar-H), 7.76-7.74 (3 H, m, Ar-H), 7.90 (2H, t, Ar-H) ppm.

$^{13}\text{C}$  NMR (125 MHz,  $\text{CDCl}_3$ ):  $\delta$ =111.2, 118.8, 125.1, 125.3, 126.1, 126.6, 127.0, 128.5, 128.7, 130.7, 130.9, 132.1, 133.8, 138.2 and 145.6 ppm.

**Compound-8 (2-Phenylpyridine)<sup>2</sup>**

Colorless liquid; <sup>1</sup>H NMR (300 MHz, CDCl<sub>3</sub>): δ=7.17 (1 H, dd Ar-H), 7.3-7.46 (3 H, m, Ar-H), 7.69 (2 H, d, Ar-H), 7.95-7.98 (2 H, m, Ar-H), 8.67 (1 H, d, Ar-H) ppm.

<sup>13</sup>C NMR (75 MHz, CDCl<sub>3</sub>): δ=120.30, 121.9, 126.7, 128.5, 128.7, 136.5, 139.2, 149.4 and 157 ppm.

**Compound-9 (3-Phenylpyridine)<sup>2,4</sup>**

White solid; <sup>1</sup>H NMR (400 MHz, CDCl<sub>3</sub>): δ=7.43–7.35 (2 H, m, Ar-H), 7.49 (2 H, t; Ar-H), 7.60 (2H; d, Ar-H), 7.88 (1 H, d, Ar-H), 8.59 (1H, d, Ar-H), 8.85 (1 H, s Ar-H) ppm.

<sup>13</sup>C NMR (100 MHz, CDCl<sub>3</sub>): δ=123.5, 127.1, 128.1, 129.0, 134.3, 136.6, 137.8, 148.3 and 148.4 ppm.

**Compound-10 (5-Phenylpyrimidine)<sup>4</sup>**

White solid; <sup>1</sup>H NMR (400 MHz, CDCl<sub>3</sub>): δ=7.47 (1H, t, Ar-H), 7.53 (2 H, t, Ar-H), 7.58 (2 H, d, Ar-H), 8.96 (2 H, s; Ar-H), 9.21 (1 H, s, Ar-H) ppm.

<sup>13</sup>C NMR (100 MHz, CDCl<sub>3</sub>): δ=126.7, 128.9, 129.3, 134.1, 134.2, 154.8 and 157.3 ppm.

**Compound-11 (3-Nitrobiphenyl-4-carbonitrile)**

White solid; <sup>1</sup>H NMR (500 MHz, CDCl<sub>3</sub>): δ=7.69 (1 H, t, Ar-H), 7.75 (2 H, dd, Ar-H), 7.81(2 H, dd, Ar-H), 7.93 (1 H, dd, Ar-H), 8.29 (1 H, dd, Ar-H), 8.46 (1 H, t, Ar-H) ppm.

<sup>13</sup>C NMR (125 MHz, CDCl<sub>3</sub>): δ=112.4, 118.3, 122.1, 123.3, 127.9, 130.2, 132.9, 133.0, 140.8 and 143.0 ppm.

**Compound-1 (Biphenyl)**

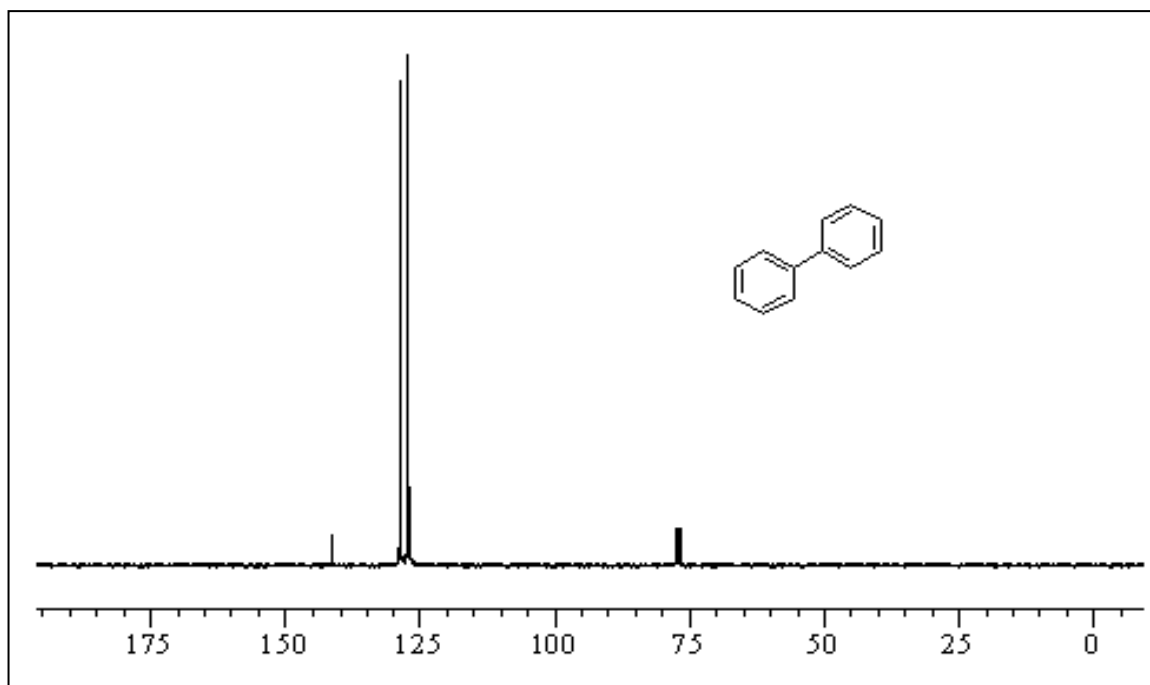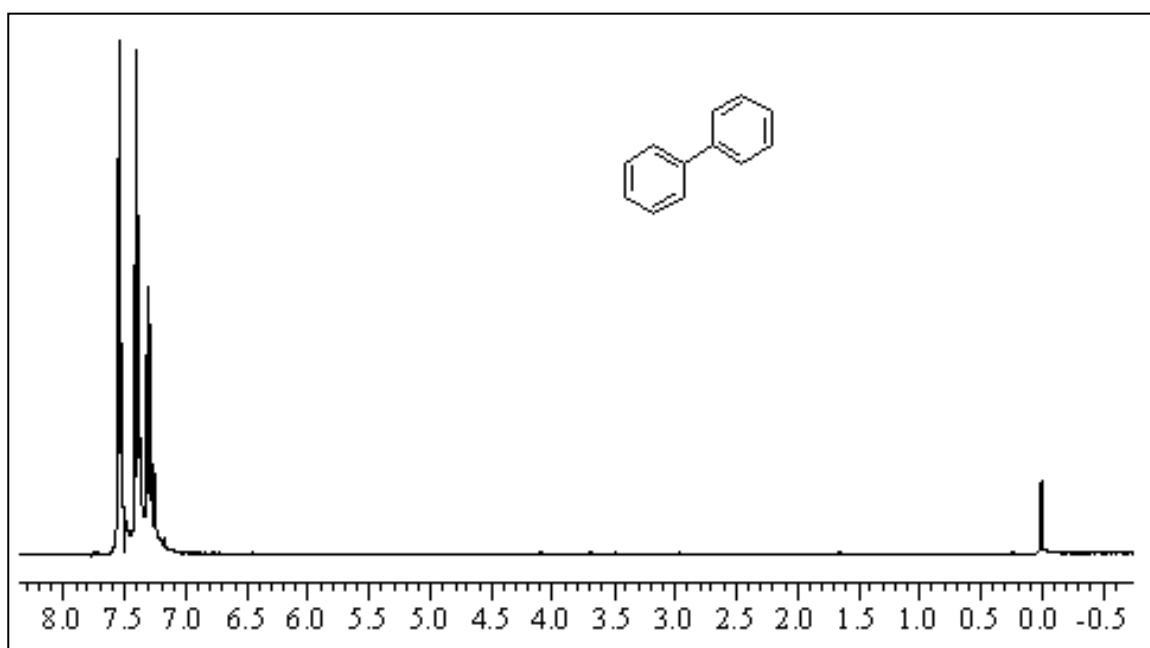

**Compound-2 (1,1'-Biphenyl)-4-carboxaldehyde)**

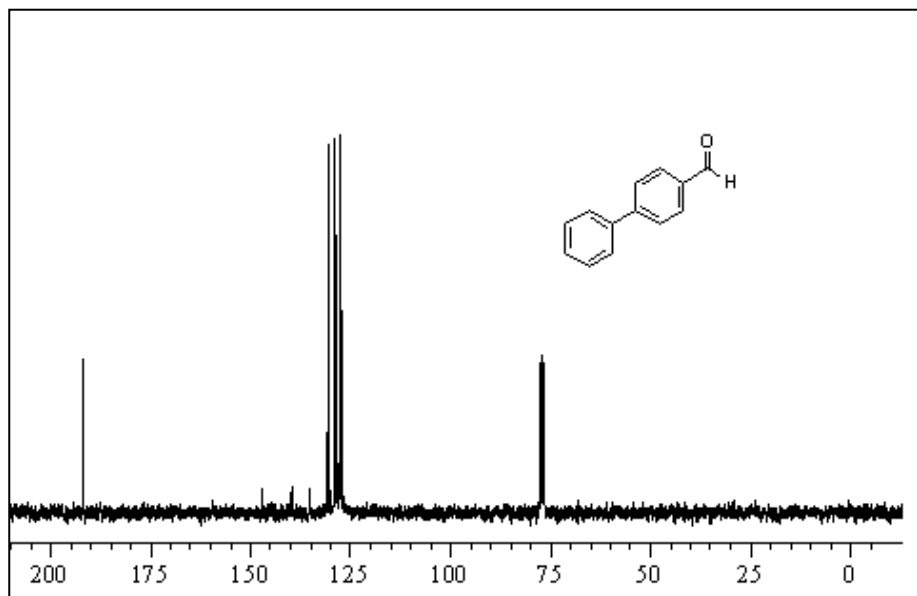

**Compound-3 (2-(4-Methoxyphenyl) naphthalene)**

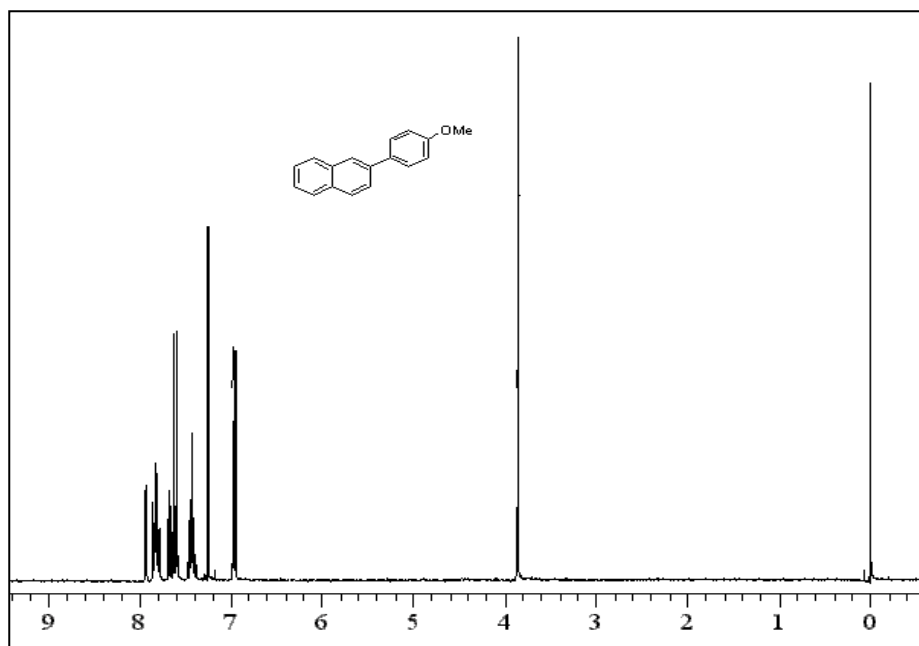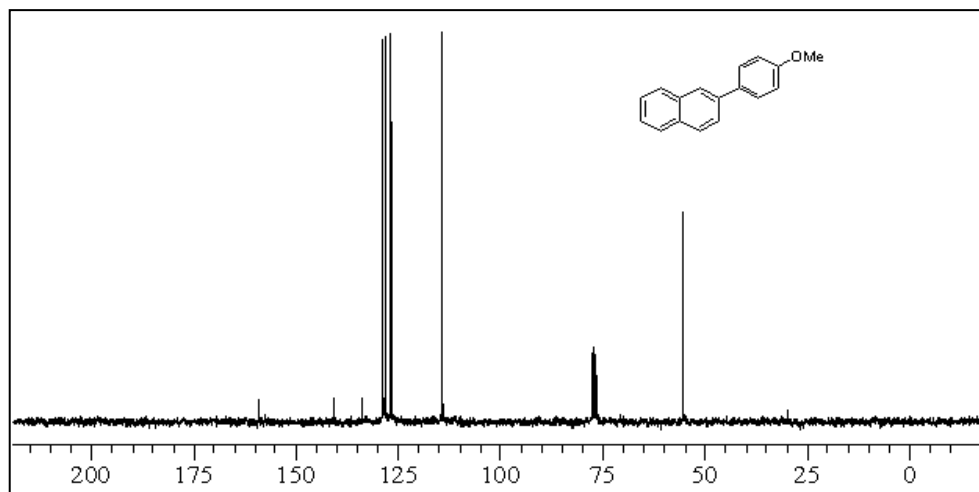

Compound-4 (4-hydroxy-1, 1'-biphenyl)

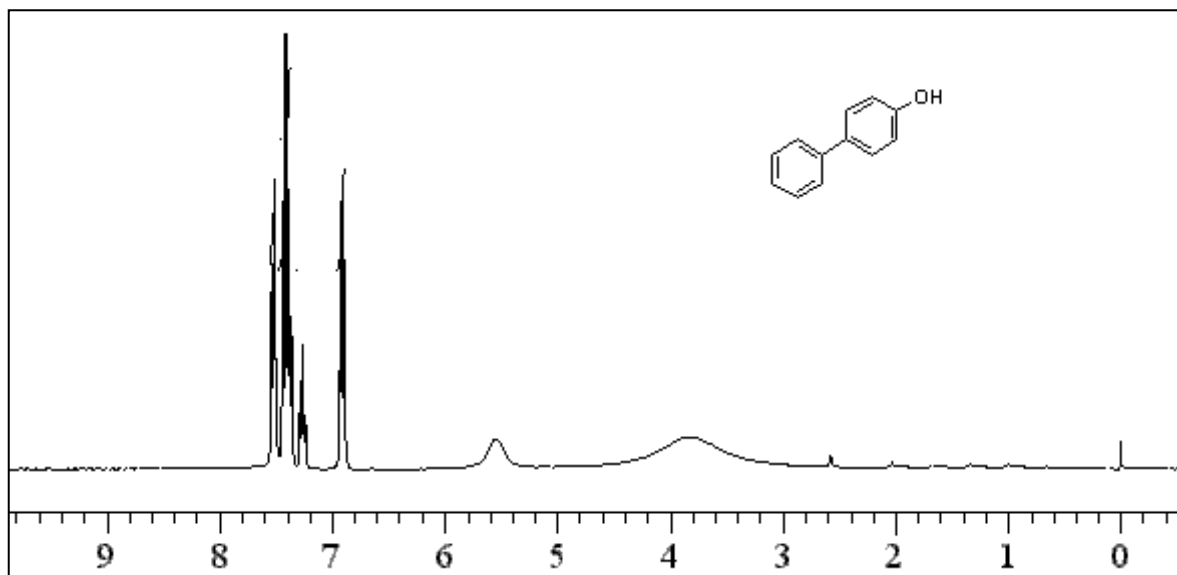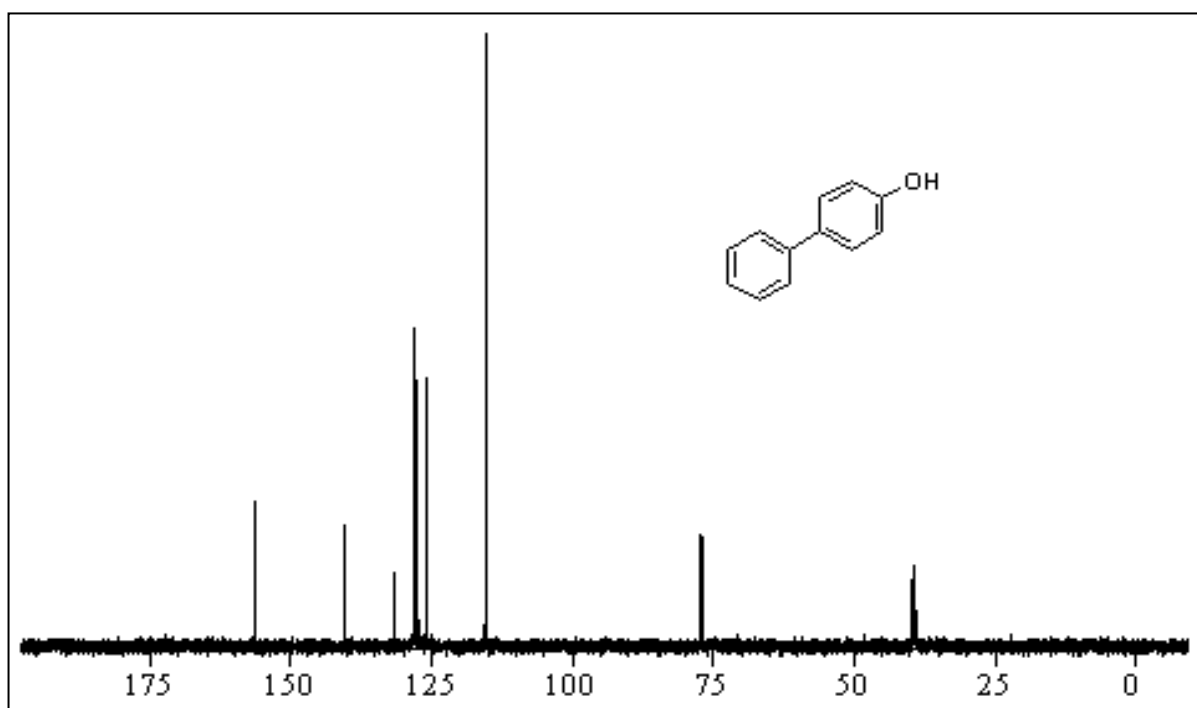

**Compound-5 (4-methyl-1, 1'-biphenyl)**

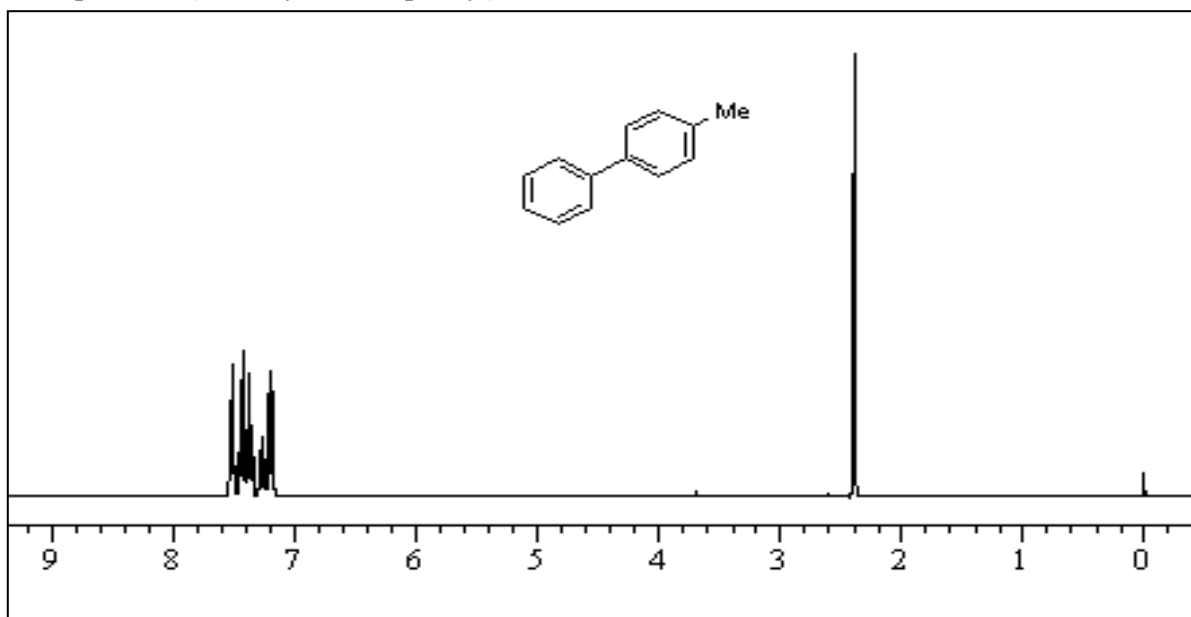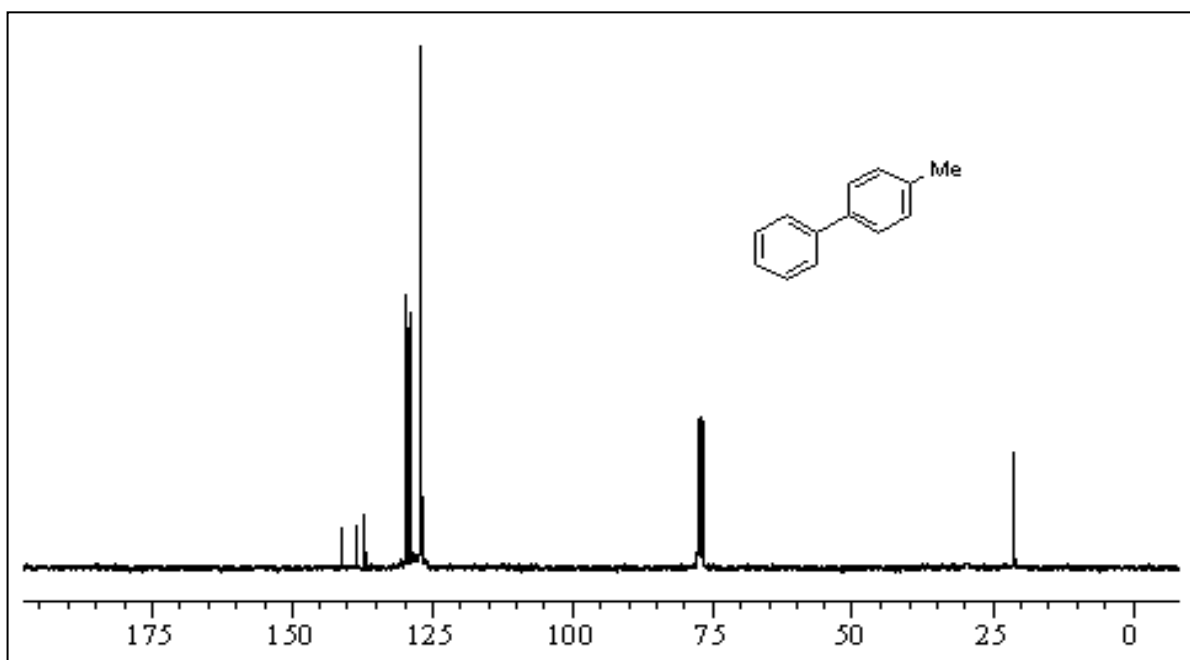



**Compound-6 (2, 4-Dimethoxy-biphenyl)**

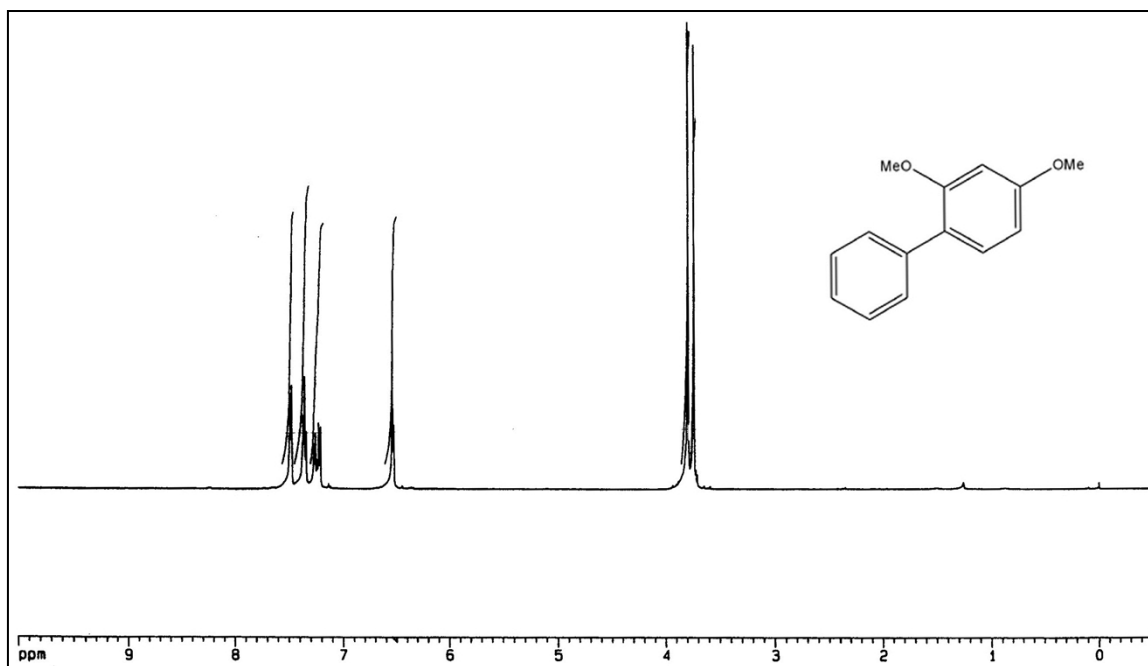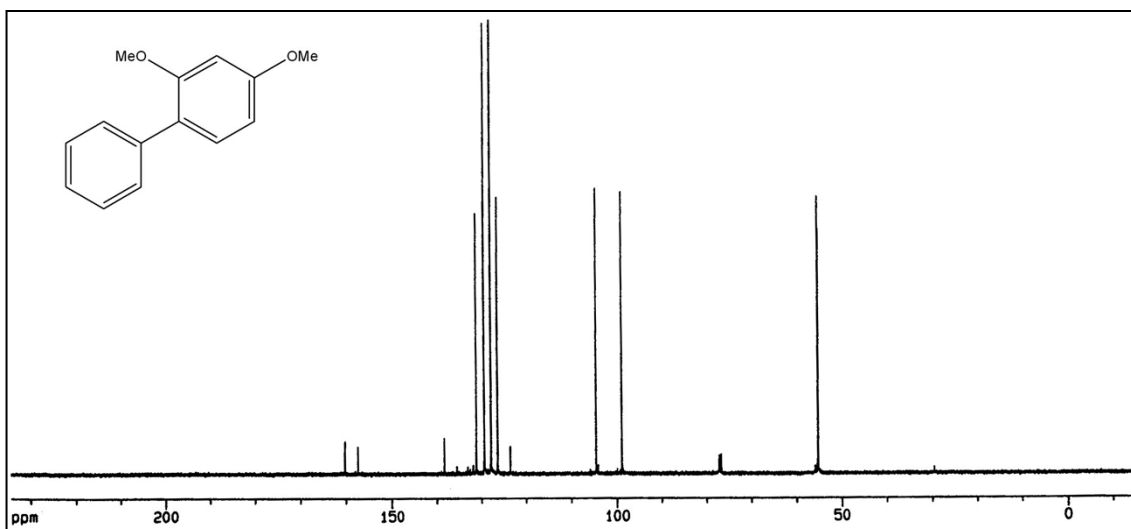

**Compound-7 (4-[1] Naphthylbenzotrile)**

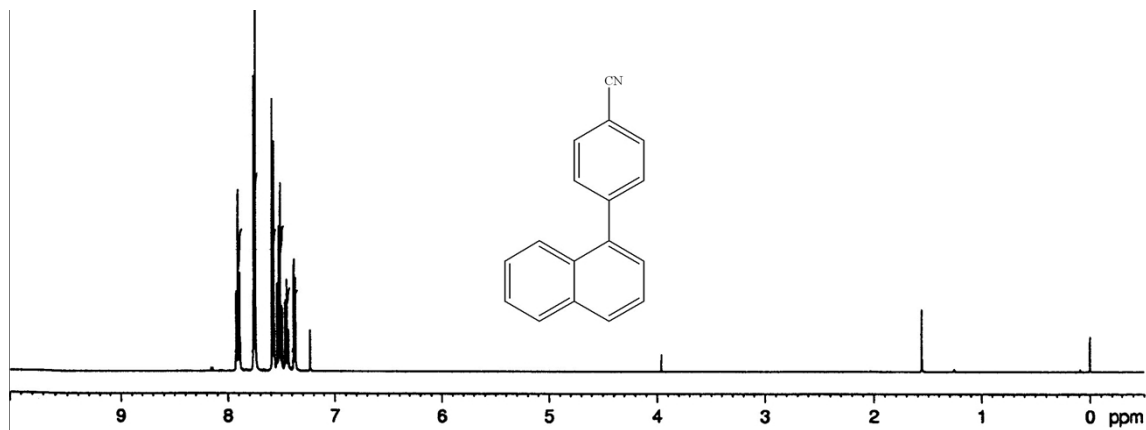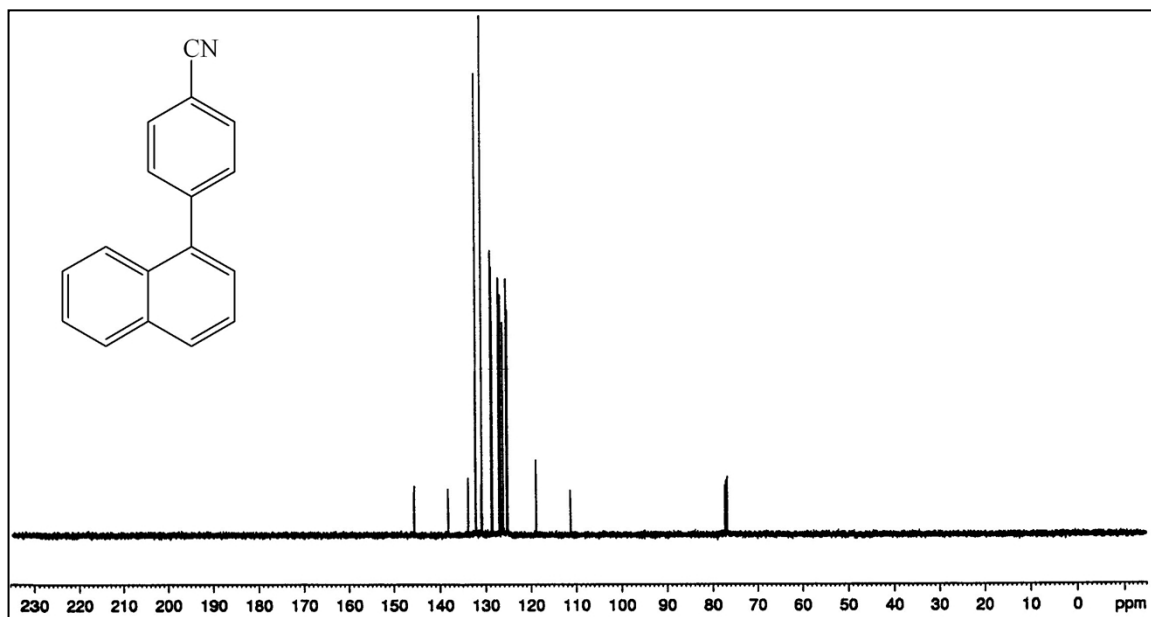

**Compound-8 (2-Phenylpyridine)**

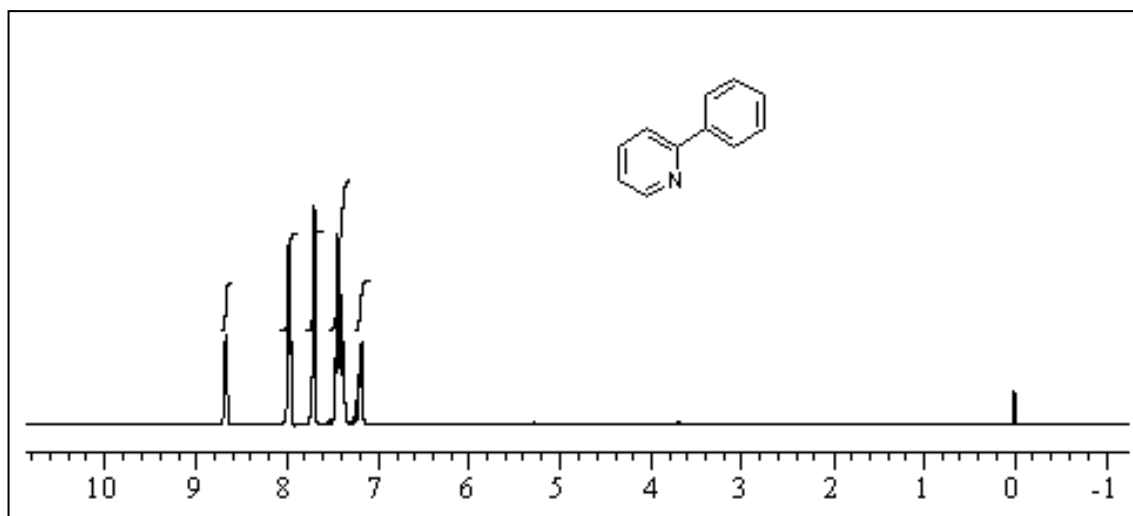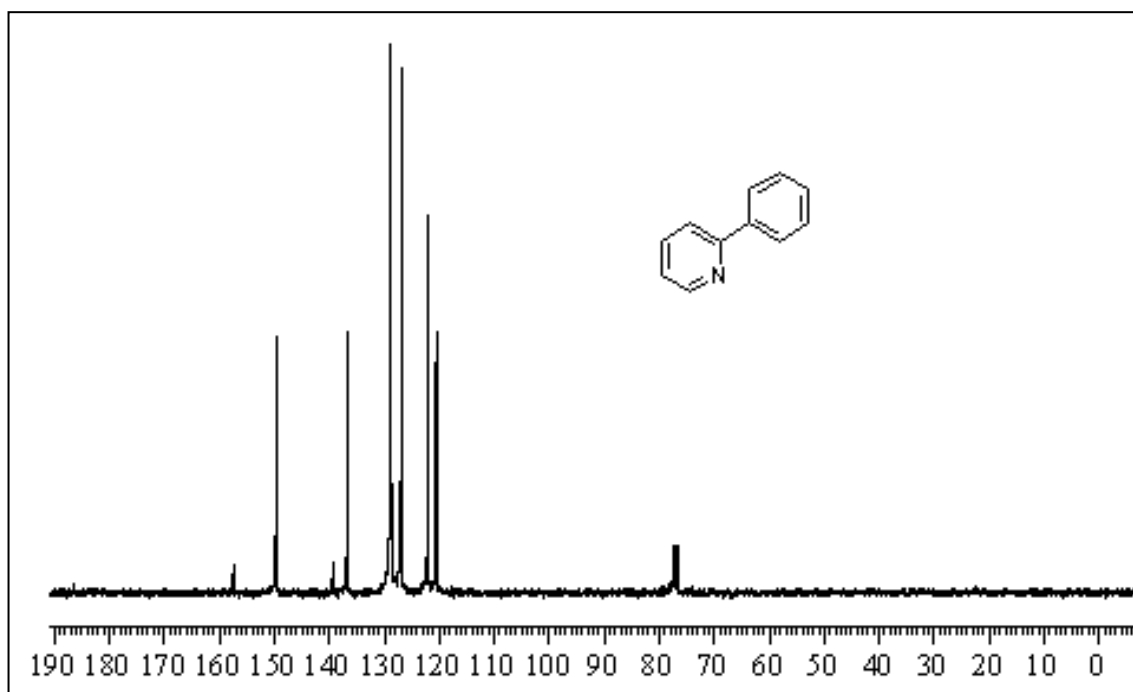

**Compound-9 (3-Phenylpyridine)**

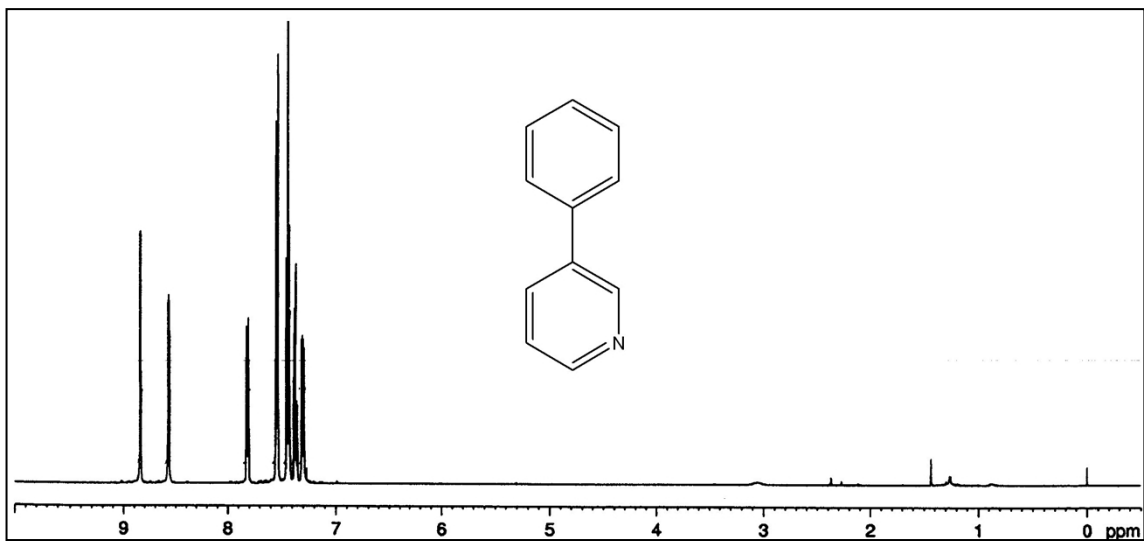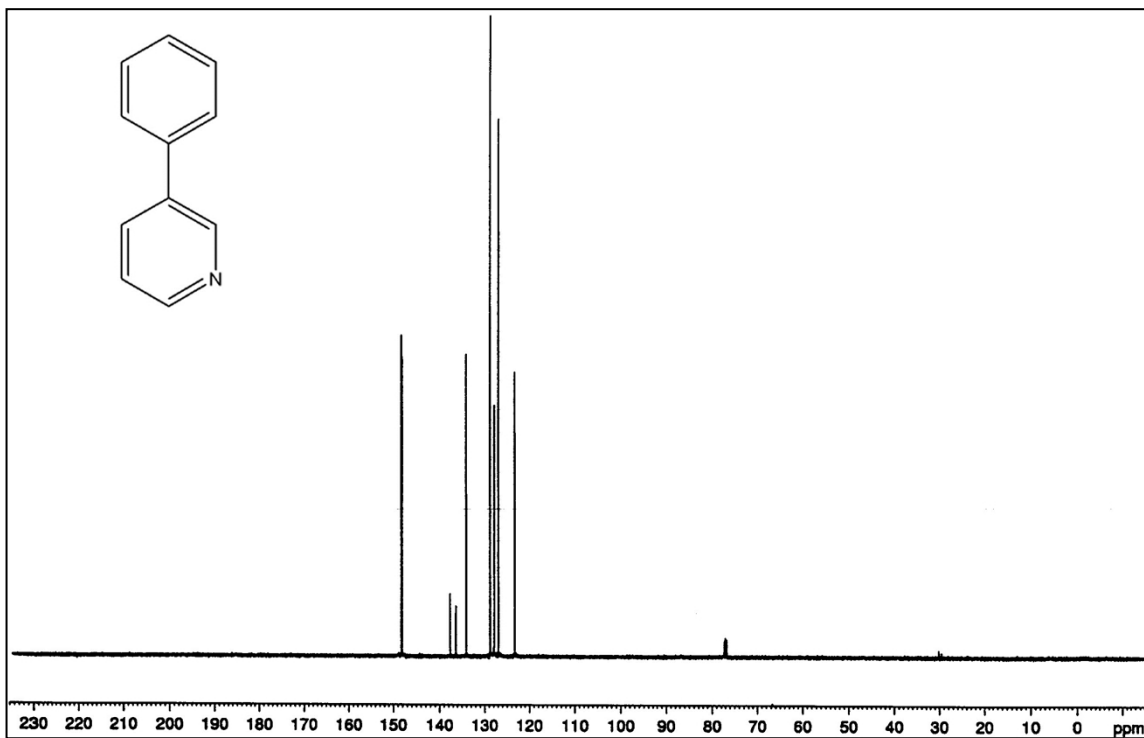

**Compound-10 (5-Phenylpyrimidine)**

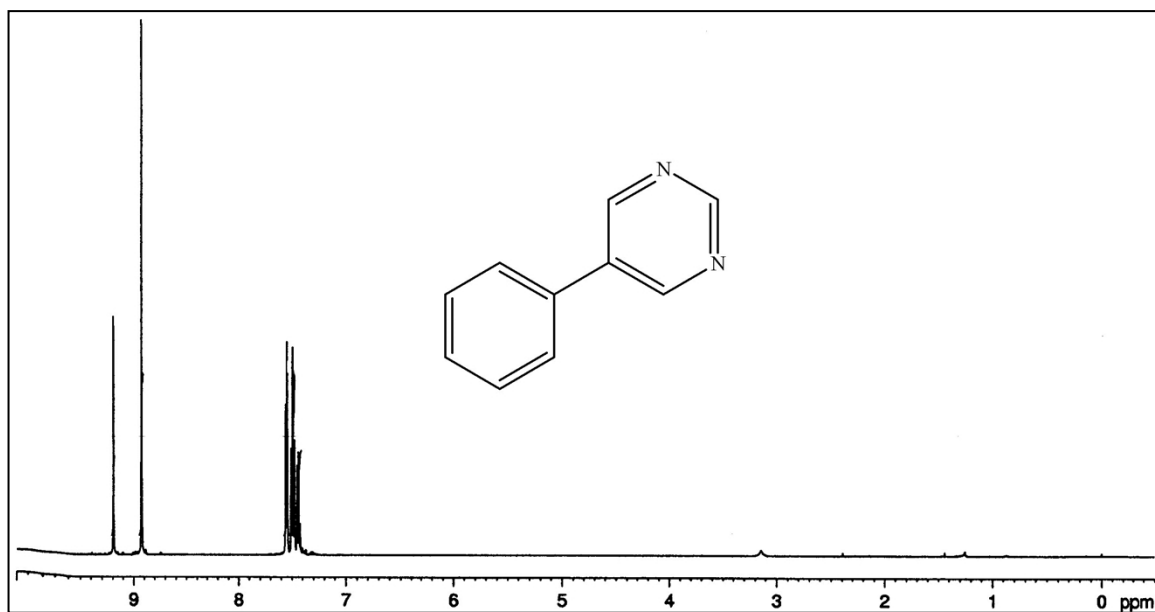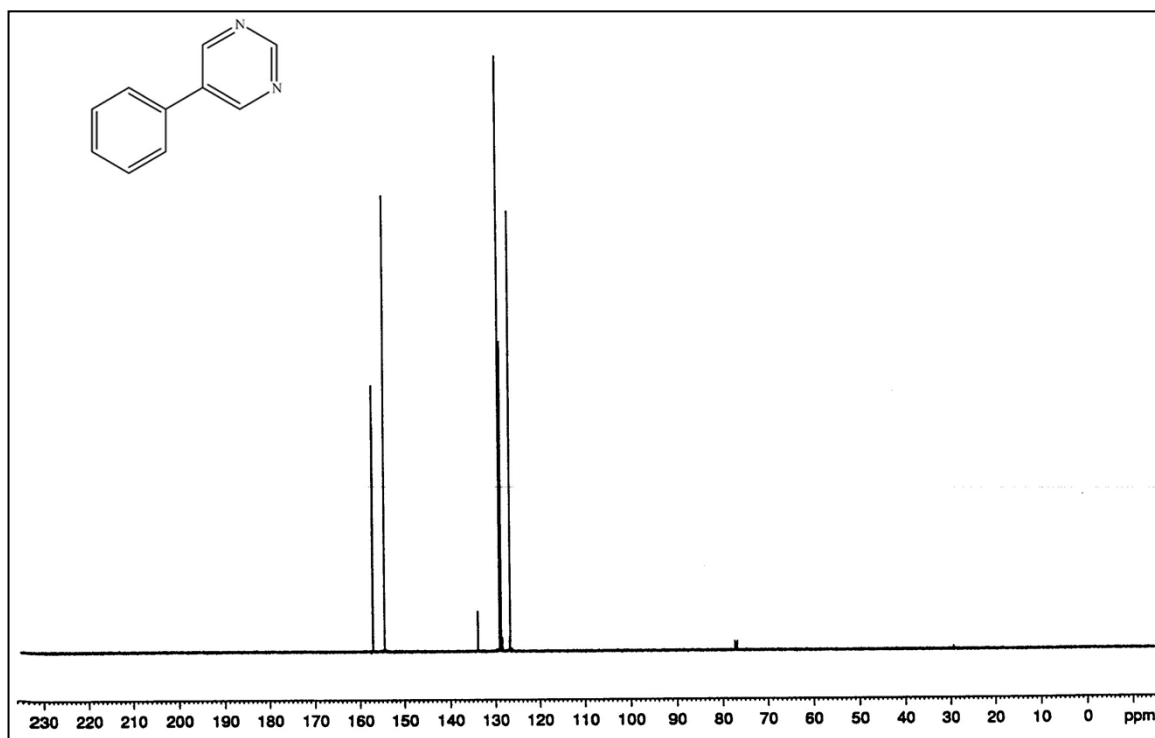

**Compound-11 (3-Nitrophenyl-4-carbonitrile)**

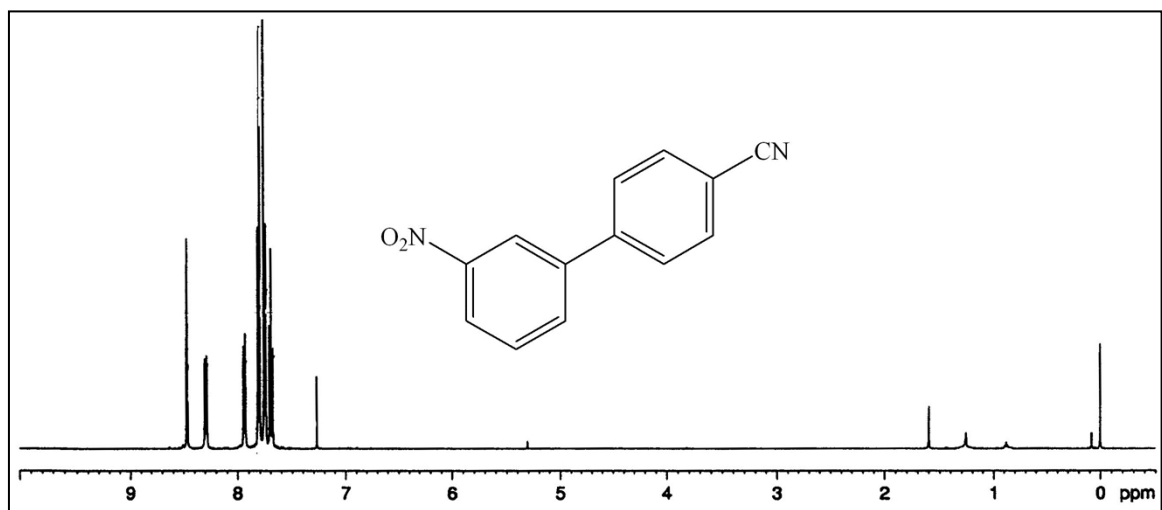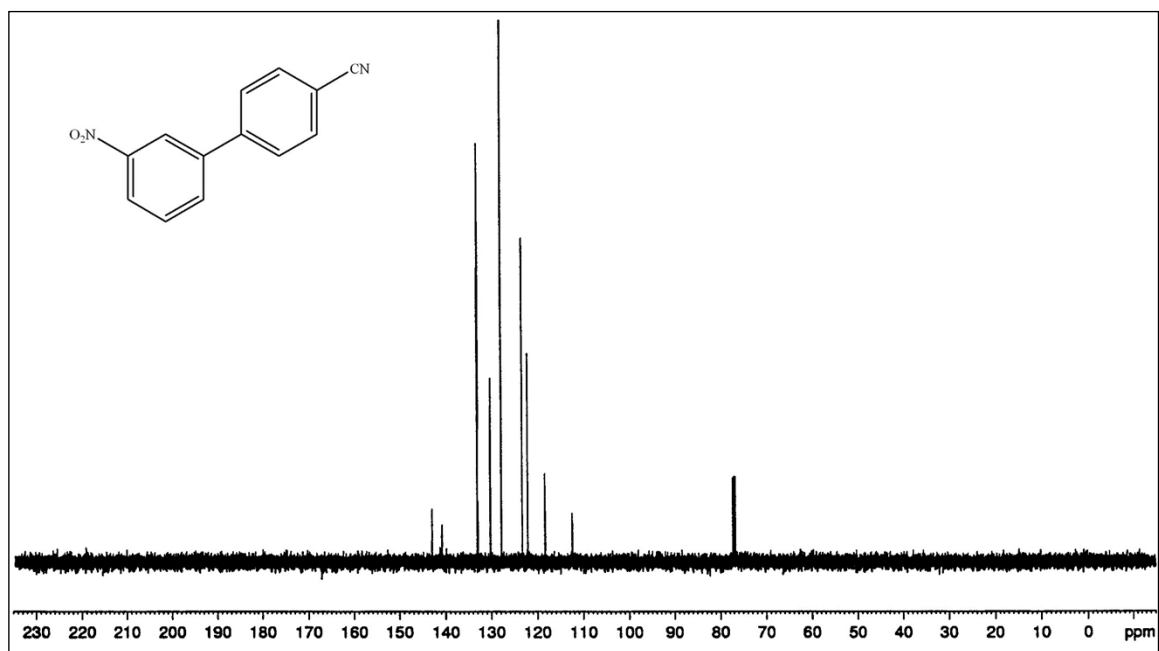

**<sup>1</sup>H and <sup>13</sup>C NMR Spectroscopic data for the Heck-Mizoroki reaction products:**

**Compound-1 (*E*)-1,2-Diphenylethene.<sup>5,6</sup>**

White crystalline solid, <sup>1</sup>H NMR (300 MHz, CDCl<sub>3</sub>): δ 7.04 (2 H, s, Ar-H), 7.16–7.21 (2 H, m, Ar-H), 7.29 (4 H, t, Ar-H), 7.46 (4 H, d, Ar-H) ppm.

<sup>13</sup>C NMR (75 MHz, CDCl<sub>3</sub>): δ 126.4, 127.5, 128.5, 128.6, 137.2 ppm

**Compound-2 (*E*)-1-Methyl-4-styrylbenzene.<sup>5-7</sup>**

White crystalline solid, <sup>1</sup>H NMR (300 MHz, CDCl<sub>3</sub>): δ 2.36 (3 H, s, CH<sub>3</sub>), 7.02 (2 H, s, Ar-H), 7.11 (2 H, d, Ar-H), 7.16–7.24 (1 H, m, Ar-H), 7.29 (2 H, t, Ar-H), 7.34 (2 H, d, Ar-H), 7.45 (2 H, d, Ar-H) ppm.

<sup>13</sup>C NMR (75 MHz, CDCl<sub>3</sub>): δ 21.2, 126.3, 127.3, 127.6, 128.6, 129.3, 134.5, 137.4 ppm.

**Compound-3 (*E*)-1-Chloro-4-styrylbenzene.<sup>6</sup>**

White crystalline solid, <sup>1</sup>H NMR (300 MHz, CDCl<sub>3</sub>): δ 7.01 (2 H, s, Ar-H), 7.19–7.39 (5H, m, Ar-H), 7.39–7.46 (4 H, m, Ar-H) ppm.

<sup>13</sup>C NMR (75 MHz, CDCl<sub>3</sub>): δ 126.5, 127.3, 127.6, 127.8, 128.6, 128.9, 129.2, 133.1, 135.8, 136.9 ppm.

**Compound-4 (*E*)-1-Methoxy-4-styrylbenzene.<sup>5</sup>**

White crystalline solid, <sup>1</sup>H NMR (300 MHz, CDCl<sub>3</sub>): δ 3.81(3 H, s, - OCH<sub>3</sub>), 6.82 (2H, d, Ar-H), 6.88–7.04 (2 H, dd, Ar-H), 7.18 (1 H, t, Ar-H), 7.29 (2 H, t, Ar-H), 7.38–7.45 (4 H, m, Ar-H) ppm.

<sup>13</sup>C NMR (75 MHz, CDCl<sub>3</sub>): δ 55.2, 114.0, 126.2, 126.5, 127.1, 127.6, 128.1, 128.5, 130.0, 137.6, 159.2 ppm.

**Compound-5 (*E*)-1-Styryl-4-(trifluoromethyl)benzene.**

White crystalline solid,  $^1\text{H}$  NMR (300 MHz,  $\text{CDCl}_3$ ):  $\delta$  6.98 (1 H, d, Ar-H), 7.08 (1 H, d, Ar-H), 7.17–7.21 (1 H, m, Ar-H), 7.22–7.27 (2 H, m, Ar-H), 7.30–7.35 (3 H, m, Ar-H), 7.47 (3 H, t, Ar-H) ppm.

$^{13}\text{C}$  NMR (75 MHz,  $\text{CDCl}_3$ ):  $\delta$  126.5, 127.3, 127.6, 127.8, 128.6, 128.7, 129.2, 133.1, 135.8, 136.9 ppm.

**Compound-6 *Trans*-Cinnamic acid.<sup>5</sup>**

White crystalline solid,  $^1\text{H}$  NMR (300 MHz,  $\text{CDCl}_3$ ):  $\delta$  6.43 (1 H, d, Ar-H), 7.34–7.41 (3 H, m, Ar-H), 7.52–7.55 (2 H, m, Ar-H), 7.79 (1H, d, Ar-H) ppm.

$^{13}\text{C}$  NMR (75 MHz,  $\text{CDCl}_3$ ):  $\delta$  117.3, 128.3, 128.8, 130.6, 133.9, 147.0, 172.7 ppm.

**Compound-7 (*E*)-*n*-Butyl cinnamate.**

Yellow liquid,  $^1\text{H}$  NMR (300 MHz,  $\text{CDCl}_3$ ):  $\delta$  0.98 (3 H;t, - $\text{CH}_3$ ), 1.38–1.93 (2 H, m, - $\text{CH}_2$ ), 1.63–1.73 (2 H, m, - $\text{CH}_2$ ), 4.18 (2 H, t, - $\text{OCH}_2$ ), 6.39 (1 H, d, Ar-H), 7.32–7.38 (3 H, m, Ar-H), 7.49 (2 H; dd, Ar-H), 7.60 (1 H; d, Ar-H) ppm.

$^{13}\text{C}$  NMR (75 MHz,  $\text{CDCl}_3$ ):  $\delta$  13.5, 18.9, 30.5, 64.1, 118.0, 127.8, 128.6, 129.9, 134.2, 144.3, 166.8 ppm.

**Compound-8 (*E*)-Methyl cinnamate.<sup>7</sup>**

Colorless liquid,  $^1\text{H}$  NMR (300 MHz,  $\text{CDCl}_3$ ):  $\delta$  3.79 (3 H, s, - $\text{OCH}_3$ ), 6.38 (1 H, d, Ar-H), 7.34–7.37 (3 H, m, Ar-H), 7.49–7.50 (2 H; m, Ar-H), 7.65 (1H, d, Ar-H) ppm.

$^{13}\text{C}$  NMR (75 MHz,  $\text{CDCl}_3$ ):  $\delta$  51.5, 117.6, 127.9, 128.7, 130.1, 134.1, 144.6, 167.2 ppm.



**Compound-9 (*E*)-3-(4-nitrophenyl) acrylic acid.** <sup>5</sup>

Pale yellow solid, <sup>1</sup>H NMR (300 MHz, DMSO-d<sub>6</sub>): δ 6.48 (1H; d, Ar-H), 7.62 (2 H, d Ar-H), 7.79 (1 H, d, Ar-H), 8.20 (2 H, d, Ar-H) ppm.

<sup>13</sup>C NMR (75 MHz, CDCl<sub>3</sub>): δ=120.2, 128.6, 130.4, 143.0, 148.2, 160.0, 172.3 ppm.

**Compound-10 (*E*)-3-(4-formylphenyl) acrylic acid.**

White solid, <sup>1</sup>H NMR (300 MHz, CDCl<sub>3</sub>): δ 6.42 (1 H; d, Ar-H), 7.72 (1 H; d, Ar-H), 7.80–7.85 (4H, m, Ar-H), 9.97 (1 H, s, - CHO) ppm.

<sup>13</sup>C NMR (75 MHz, CDCl<sub>3</sub>): δ 116.9, 129.6, 130.1, 136.2, 141.2, 144.5, 171.5, 191.5 ppm.

**Compound-11 (*E*)-3-(4-methoxyphenyl) acrylic acid.** <sup>5</sup>

Pale brown crystalline solid, <sup>1</sup>H NMR (300 MHz, CDCl<sub>3</sub>): δ 3.85 (3 H, s, - OCH<sub>3</sub>), 6.42 (1 H, d, Ar-H), 6.99 (2 H, d, Ar-H), 7.58 (2 H, d, Ar-H), 7.82 (1 H, d, Ar-H) ppm.

<sup>13</sup>C NMR (75 MHz, CDCl<sub>3</sub>): δ 55.2, 114.0, 117.2, 128.4, 130.2, 134.2, 147.0, 172.3 ppm.

1.  $^1\text{H}$  NMR (300 MHz,  $\text{CDCl}_3$ ) spectrum of (*E*)-1,2-Diphenylethene.

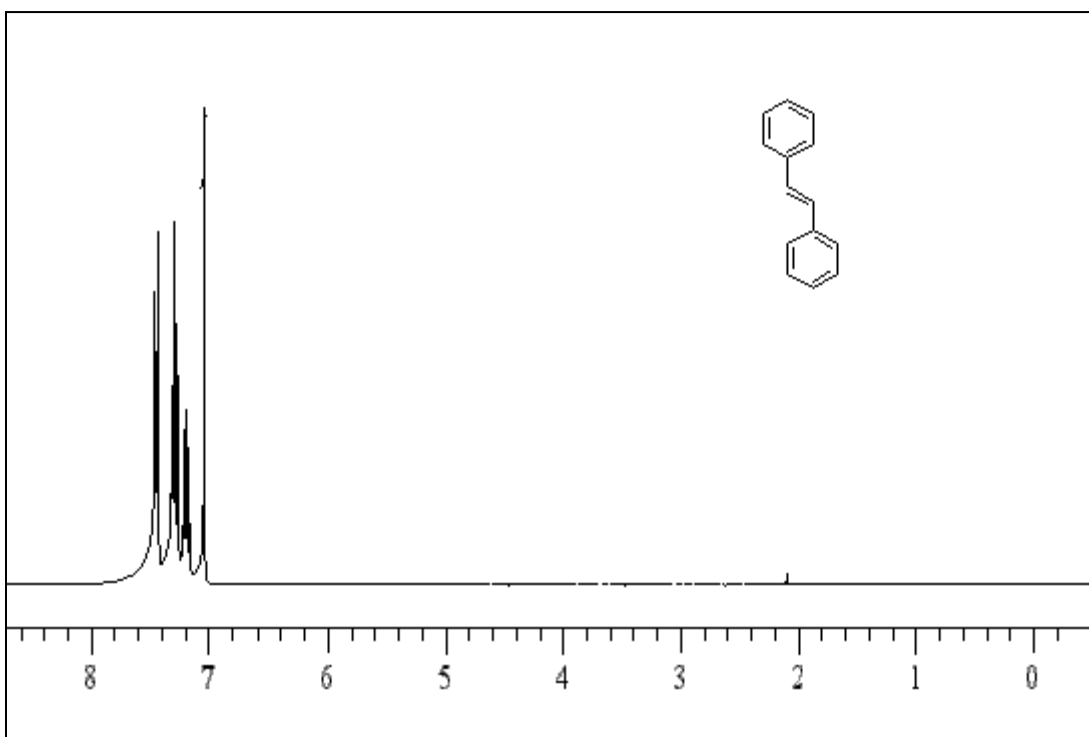

$^{13}\text{C}$  NMR (50 MHz,  $\text{CDCl}_3$ ) spectrum of (*E*)-1,2-Diphenylethene.

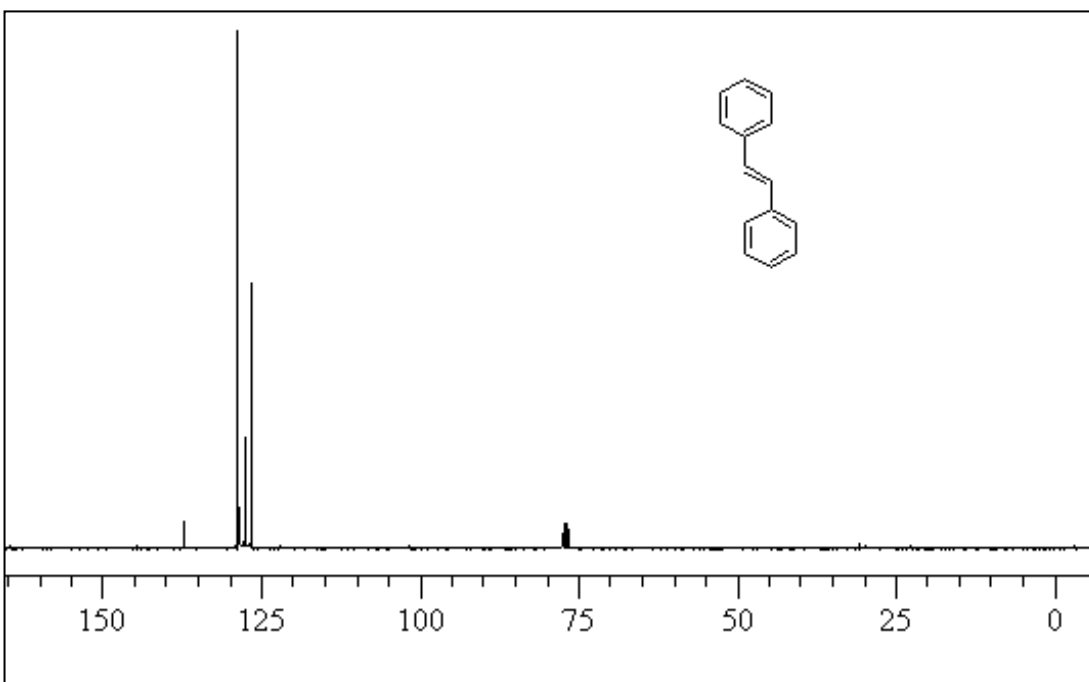

2.  $^1\text{H}$  NMR (300 MHz,  $\text{CDCl}_3$ ) spectrum of (*E*)-1-Methyl-4-styrylbenzene.

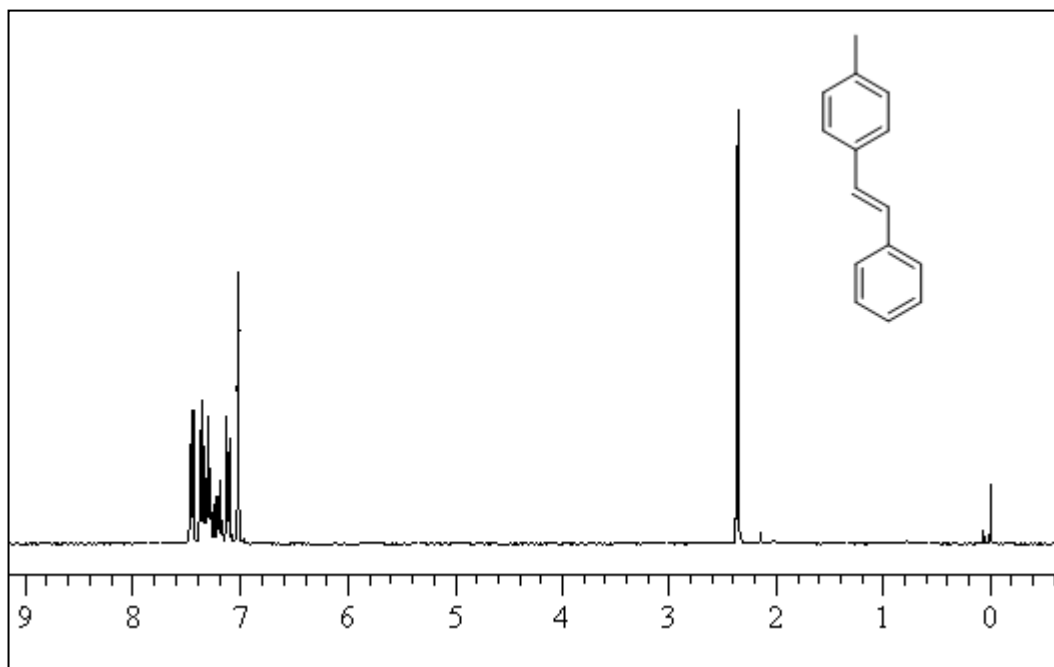

$^{13}\text{C}$  NMR (75 MHz,  $\text{CDCl}_3$ ) spectrum of (*E*)-1-Methyl-4-styrylbenzene.

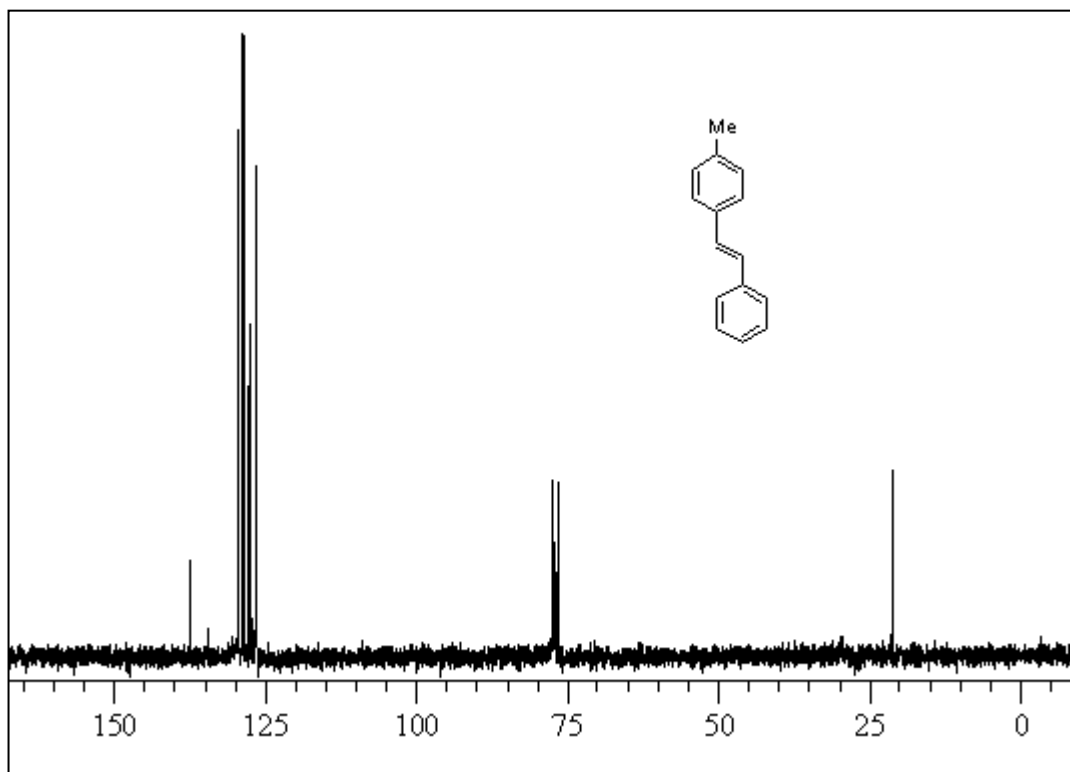

3.  $^1\text{H}$  NMR (300 MHz  $\text{CDCl}_3$ ) spectrum of (*E*)-1-Chloro-4-styrylbenzene

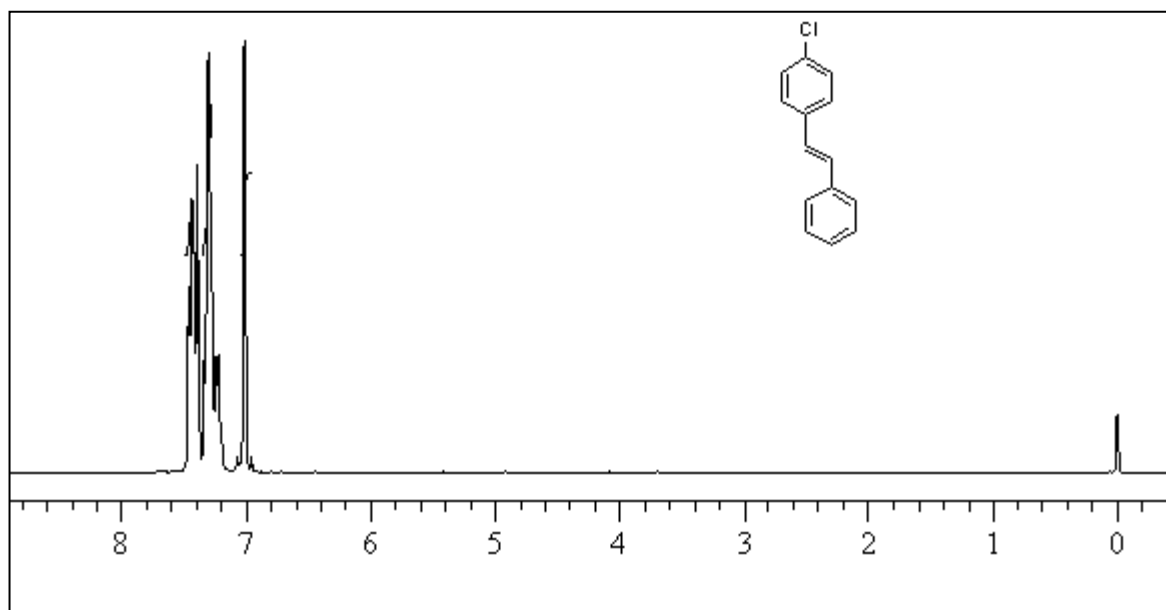

$^{13}\text{C}$  NMR (75 MHz,  $\text{CDCl}_3$ ) spectrum of (*E*)-1-Chloro-4-styrylbenzene.

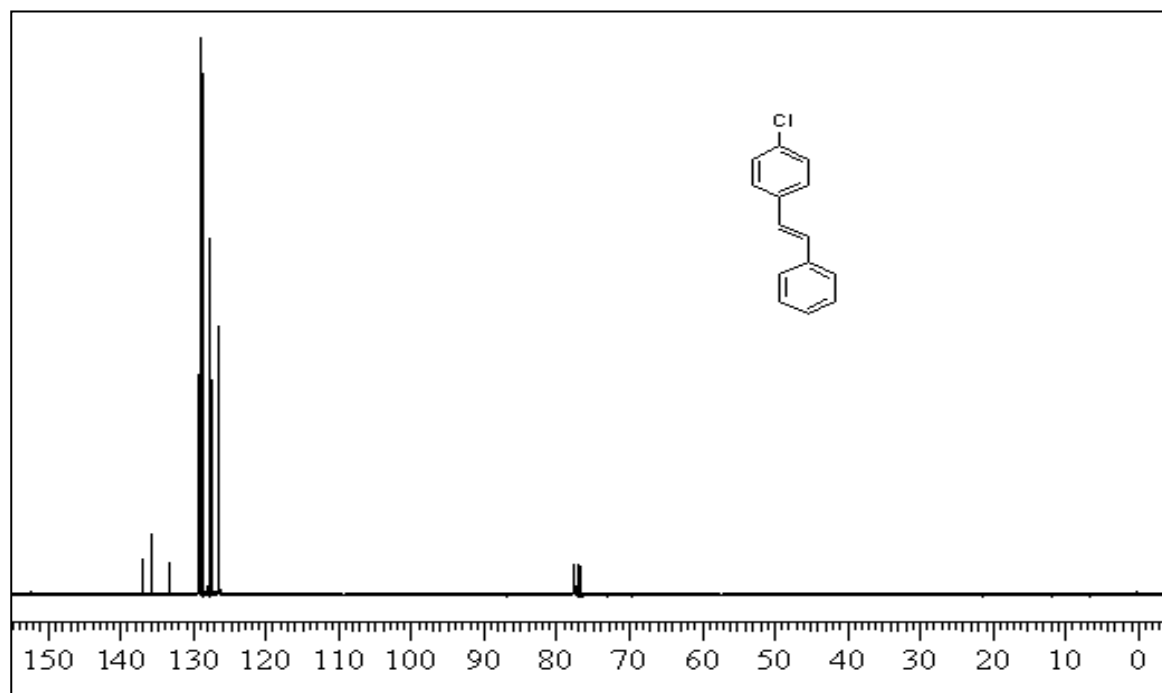

4.  $^1\text{H}$  NMR (300 MHz  $\text{CDCl}_3$ ) spectrum of (*E*)-1-Methoxy-4-styrylbenzene.

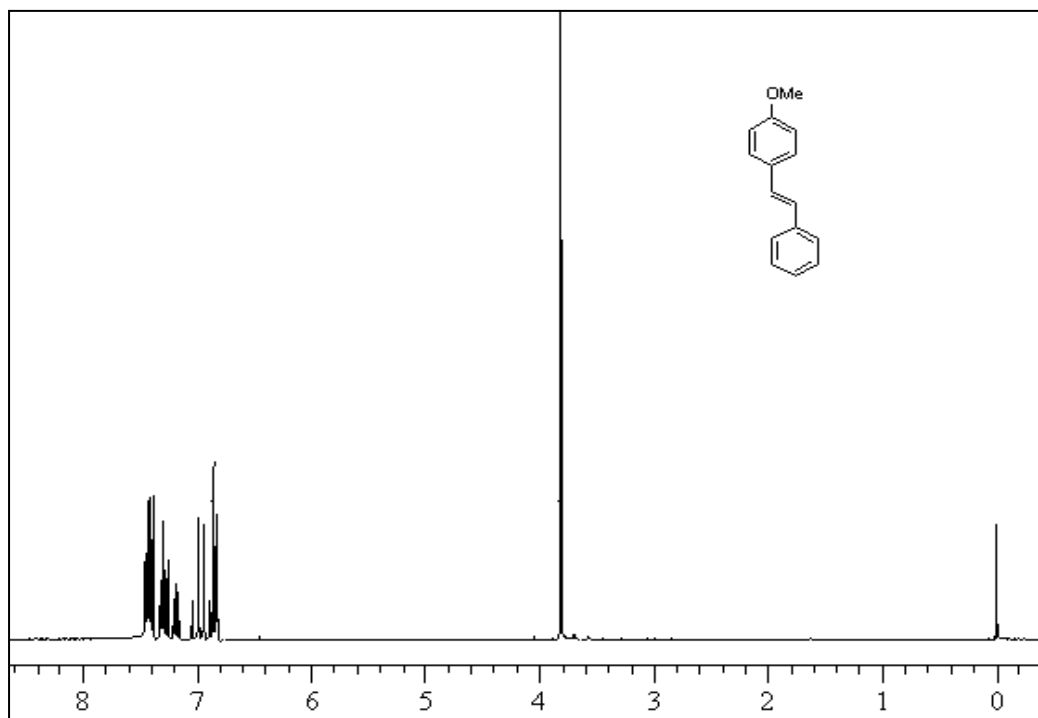

$^{13}\text{C}$  NMR (75 MHz,  $\text{CDCl}_3$ ) spectrum of (*E*)-1-Methoxy-4-styrylbenzene.

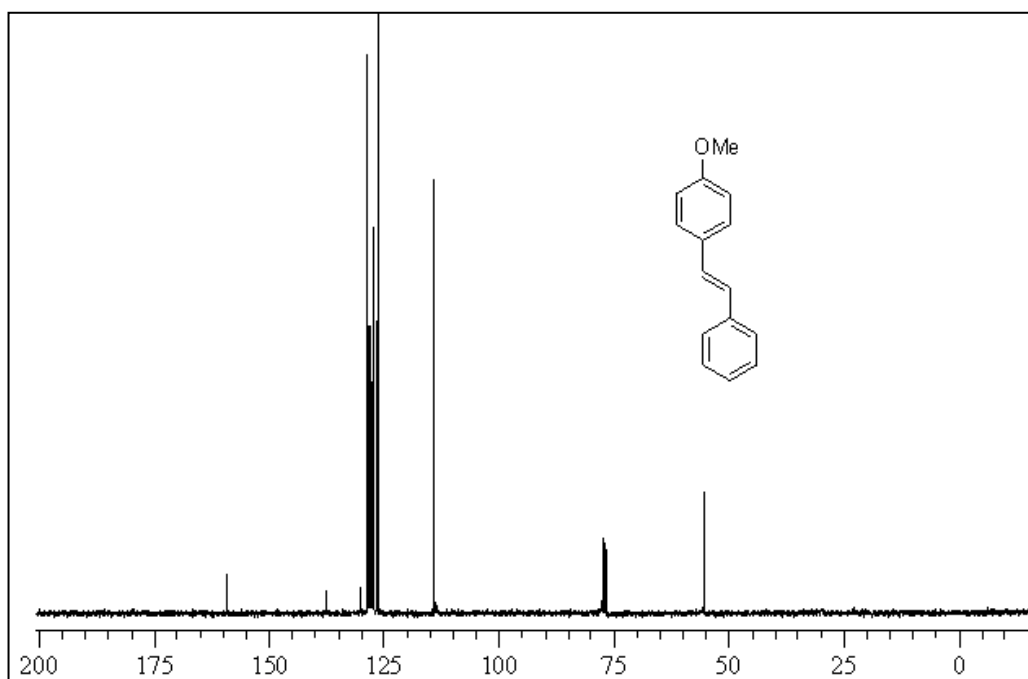

5.  $^1\text{H}$  NMR (300 MHz  $\text{CDCl}_3$ ) spectrum of (*E*)-1-Styryl-4-(trifluoromethyl)benzene.

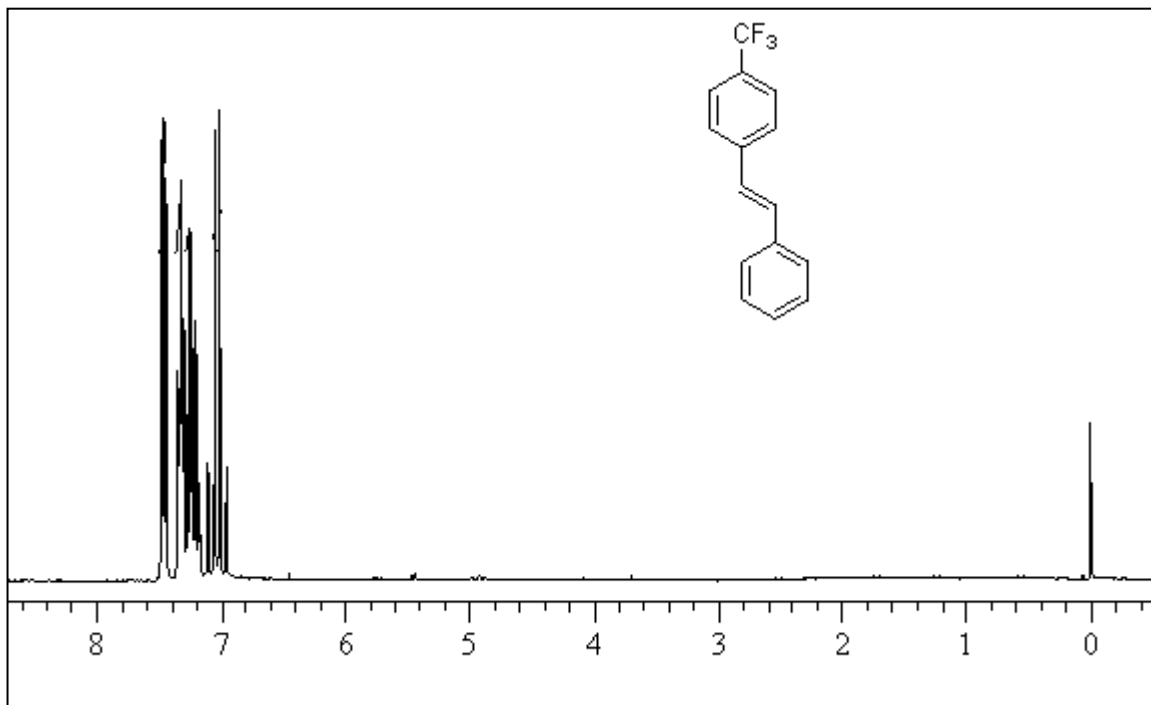

$^{13}\text{C}$  NMR (75 MHz,  $\text{CDCl}_3$ ) spectrum of (*E*)-1-Styryl-4-(trifluoromethyl) benzene.

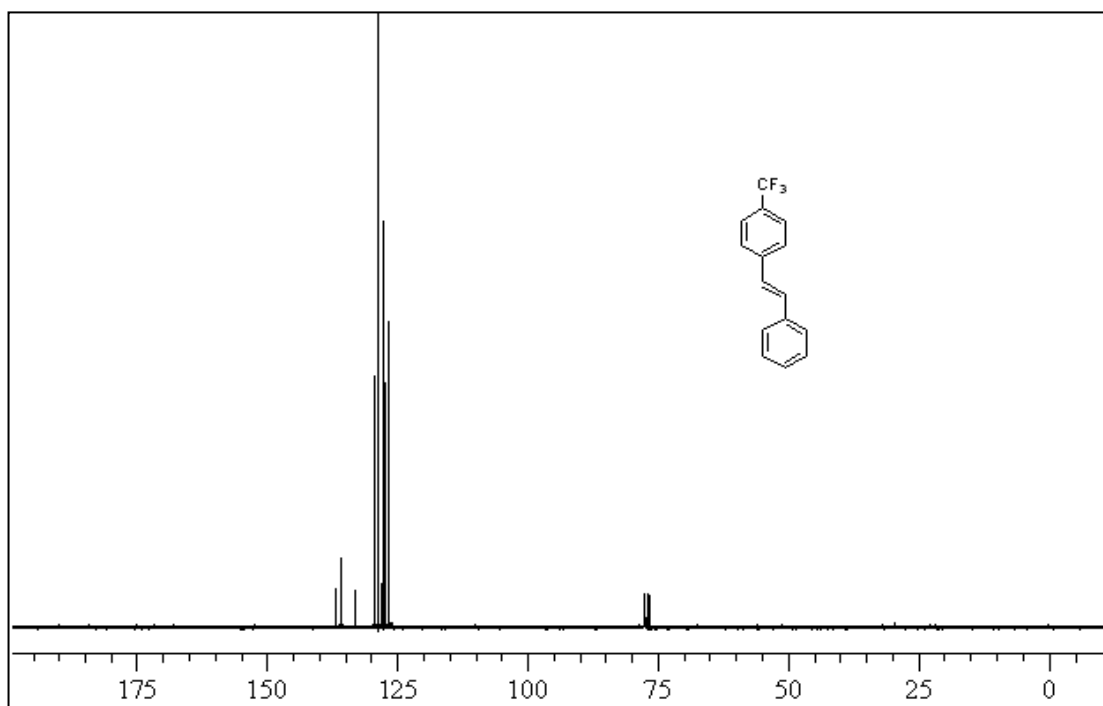

6.  $^1\text{H}$  NMR (300 MHz,  $\text{CDCl}_3$ ) spectrum of *trans* cinnamic acid.

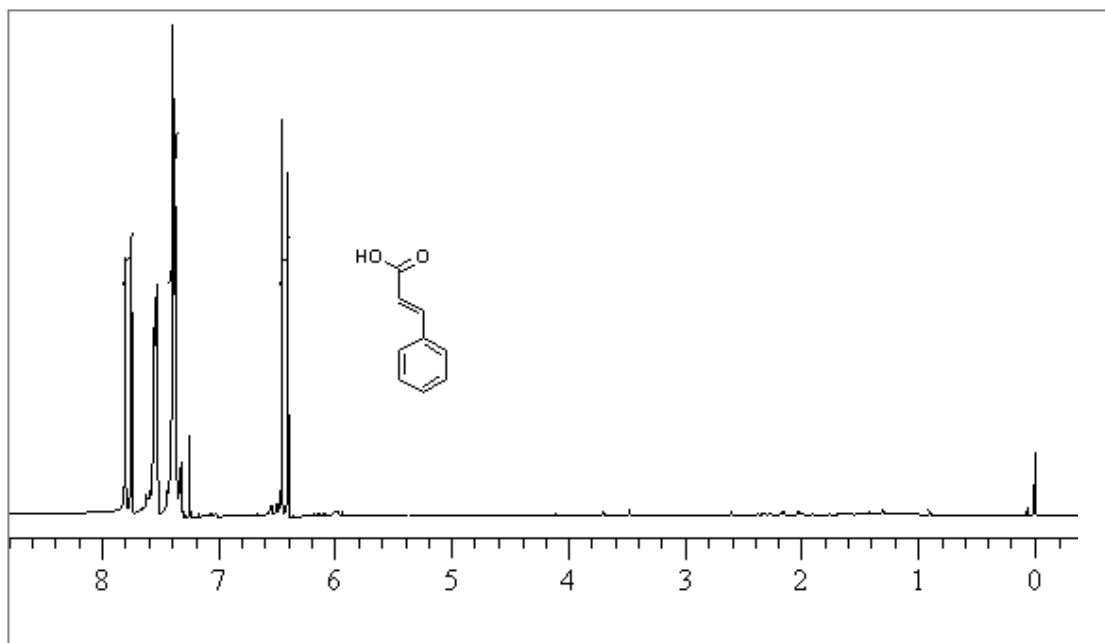

$^{13}\text{C}$  NMR (75 MHz,  $\text{CDCl}_3$ ) spectrum of *trans* cinnamic acid.

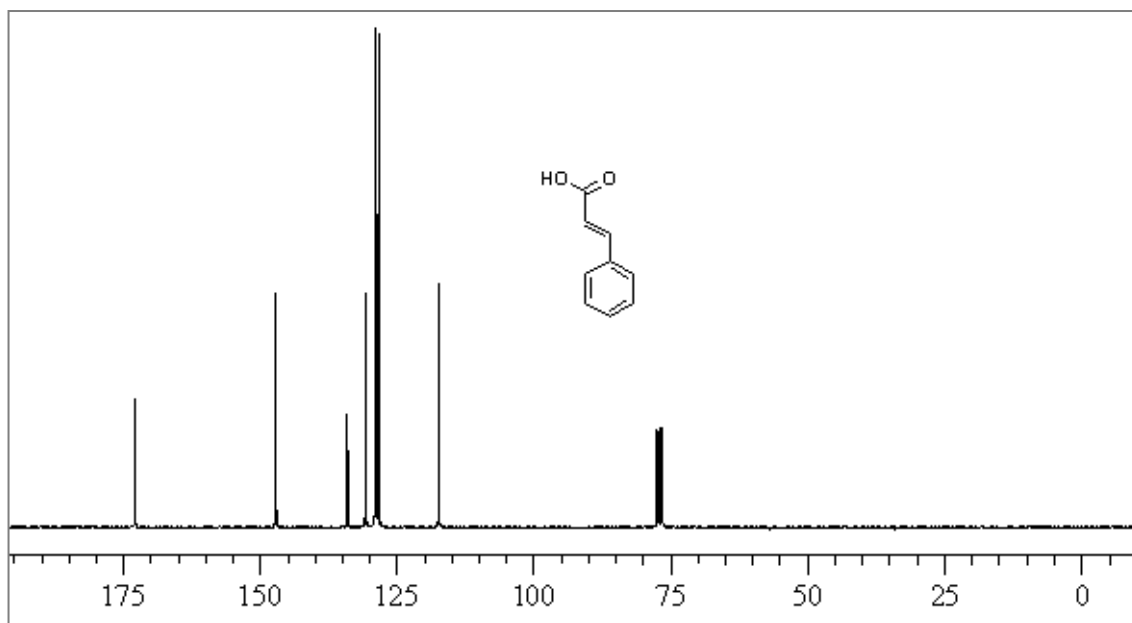

7.  $^1\text{H}$  NMR (300 MHz,  $\text{CDCl}_3$ ) spectrum of (*E*)-*n*-butyl cinnamate.

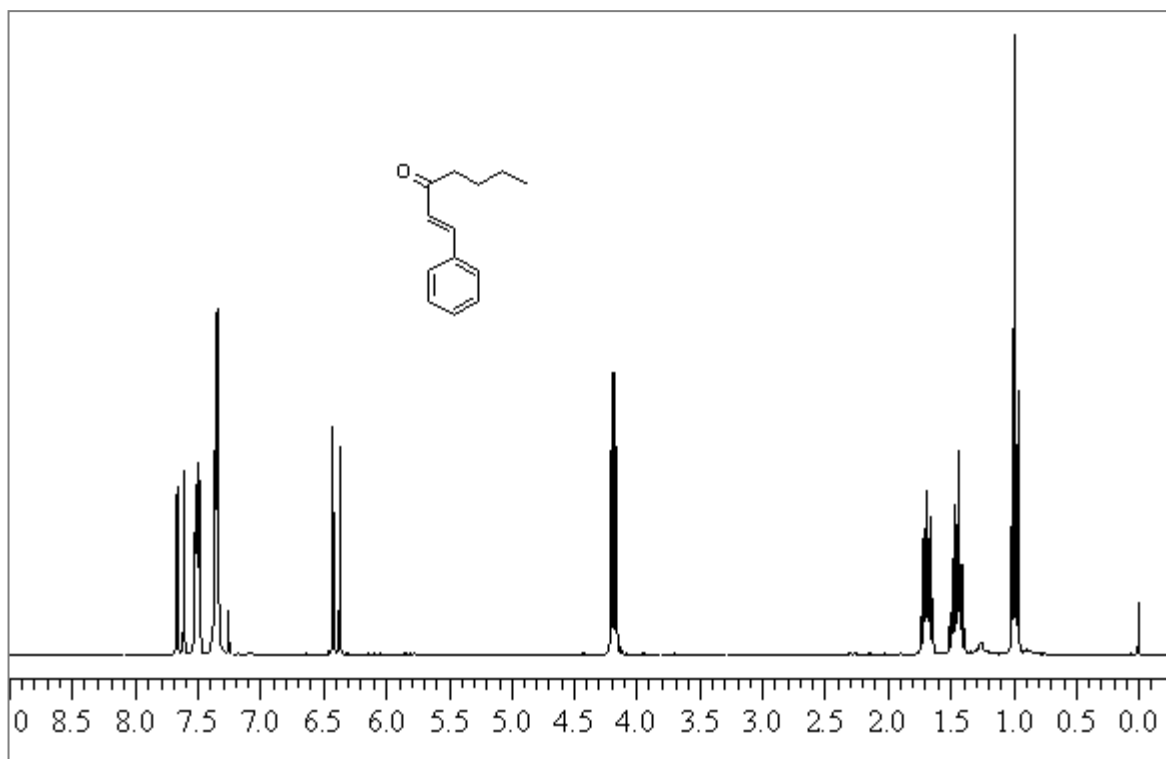

$^{13}\text{C}$  NMR (75 MHz,  $\text{CDCl}_3$ ) spectrum of (*E*)-*n*-butyl cinnamate.

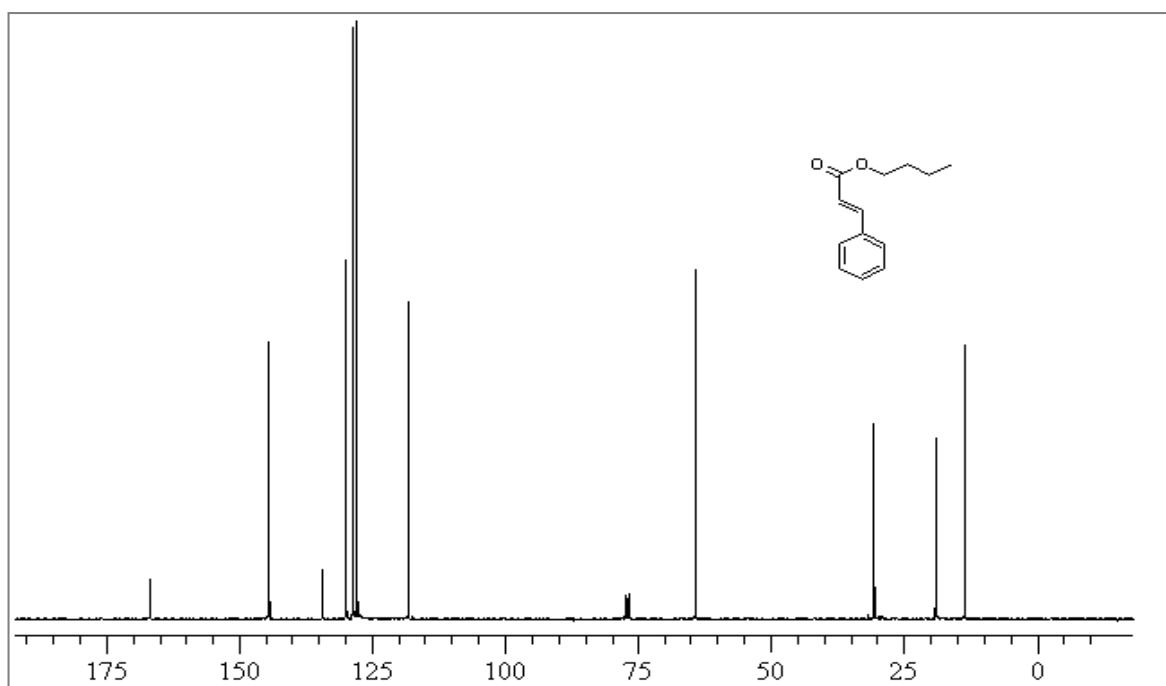



8.  $^1\text{H}$  NMR (300 MHz,  $\text{CDCl}_3$ ) spectrum of (*E*)-methyl cinnamate.

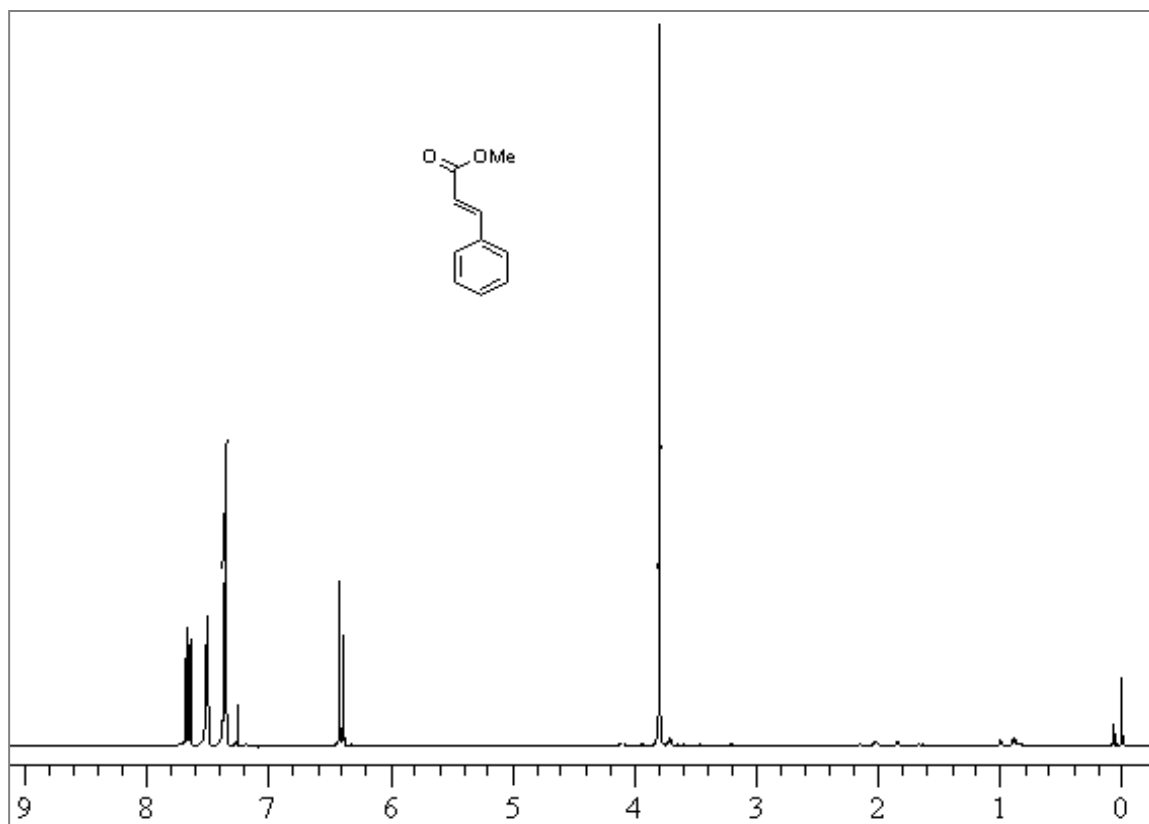

$^{13}\text{C}$  NMR (75 MHz,  $\text{CDCl}_3$ ) spectrum of (*E*)-methyl cinnamate.

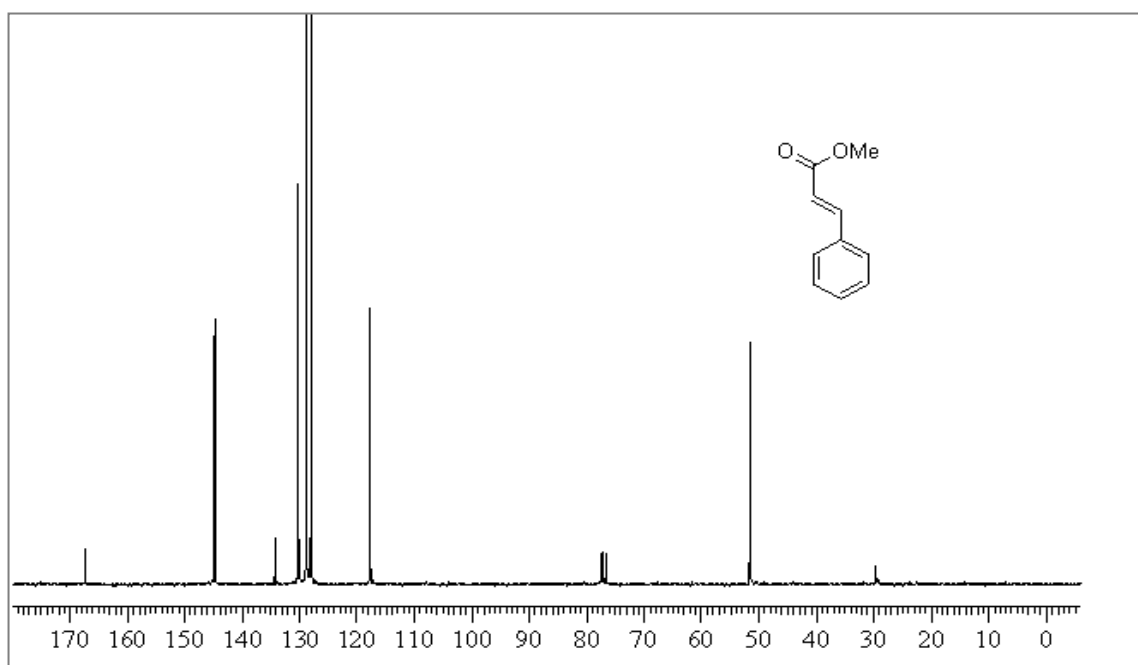

## References

- [1] R. K. Arvela and N. E. Leadbeater, *Org. Lett.*, 2005, **7**, No. 11.
- [2] L. Wu, B. L. Li, Y. Y. Huang, H. F. Zhou, Y. M. He and Q. H. Fan, *Org. Lett.*, 2006, **8**, 3605-3608.
- [3] M. Tobisu, T. Shimasaki and N. Chatani, *Angew. Chem. Int. Ed.*, 2008, **47**, 4866-4869.
- [4] J.-H. Li, Q.-M. Zhu and Y.X. Xie, *Tetrahedron*, 2006, **62**, 10888-10895.
- [5] A. Modak, J. Mondal, M. Sasidharan and A. Bhaumik, *Green Chem.*, 2011, **13**, 1317-1331.
- [6] K-N. Ali and P. Farhad, *Green. Chem.*, 2011, **13**, 2408 –2415.
- [17] L. R. Moore and K. H. Shaughnessy, *Org. Lett.*, 2004, **6**, 225-228.
